# Supplementary material for: 1,10/1,11-Cyclization catalyzed by diverged plant sesquiterpene synthases is dependent on a single residue
Source: Royal Society of Chemistry journal article supplement (doi:10.1039/d1ob00827g), 2021-01-01
Supplement: d1ob00827g1.pdf [file d1ob00827g1.pdf]

## Supporting Information

### **1, 10/1, 11 Cyclization catalyzed by diverged plant sesquiterpene synthases is dependent on a single residue**

Jin-Quan Huang<sup>‡a,b</sup>, Dong-Mei Li<sup>‡a,c</sup>, Jian-Xu Li<sup>b</sup>, Jia-Ling Lin<sup>b,d</sup>, Xiu Tian<sup>b</sup>, Ling-Jian Wang<sup>b</sup>,  
Xiao-Ya Chen<sup>b</sup>, and Xin Fang<sup>c\*</sup>

*<sup>a</sup> Yunnan University, Kunming, P.R. China*

*<sup>b</sup> National Key Laboratory of Plant Molecular Genetics, Institute of Plant Physiology and Ecology/CAS Center for Excellence in Molecular Plant Sciences, Chinese Academy of Sciences, Shanghai 200032, PR China.*

*<sup>c</sup> State Key Laboratory of Phytochemistry and Plant Resources in West China, Kunming Institute of Botany, Chinese Academy of Sciences Kunming, Yunnan 650201, PR China*

*<sup>d</sup> School of Life Science and Technology, ShanghaiTech University, Shanghai 200031, China*

\* To whom correspondence should be addressed:

E-mail: [xinfang@mail.kib.ac.cn](mailto:xinfang@mail.kib.ac.cn)

<sup>‡</sup> These authors contributed equally to this work.

## Contents of Supporting Information

|                                                                                                      |    |
|------------------------------------------------------------------------------------------------------|----|
| <b>Experimental section</b>                                                                          | 3  |
| <b>Fig. S1</b> Alignment of 1,10-cyclases.                                                           | 5  |
| <b>Fig. S2</b> Alignment of 1,11-cyclases.                                                           | 7  |
| <b>Fig. S3</b> Alignment of 1,6-cyclases.                                                            | 8  |
| <b>Fig. S4</b> Mass spectra of products generated by enzymes used in the manuscript.                 | 9  |
| <b>Fig. S5</b> Effect of substitution of Cys at <sup>pre</sup> NSE/DTE position of SmSTPS3 with Ser. | 14 |
| <b>Fig. S6</b> Effect of substitution of Ser at <sup>pre</sup> NSE/DTE position of AaGAS with Cys.   | 14 |
| <b>Fig. S7</b> Effect of substitution of Cys at <sup>pre</sup> NSE/DTE position of AaCES with Gly.   | 15 |
| <b>Table S1</b> Plant sesquiterpene synthases used for the phylogenetic analysis.                    | 16 |
| <b>Table S2</b> Oligo-nucleotide primers used in this study.                                         | 19 |
| <b>Table S3</b> Product profiles of SmSTPS3, AaGAS and their mutants (%).                            | 20 |
| <b>Table S4</b> Product profiles of AtTPS21 and its mutants (%).                                     | 20 |
| <b>Table S5</b> Product profiles of PTSiso and its mutants (%).                                      | 20 |
| <b>Table S6</b> Retention indices of new products generated by mutant enzymes.                       | 21 |
| <b>Table S7</b> Kinetic parameters of SmSTPS3, AaGAS, AtTPS21, PTSiso and their mutants with FDP.    | 21 |

## **Experimental section**

### **Phylogenetic analysis**

The protein sequences of 163 sesquiterpene synthases (Table S1) were obtained by searching the NCBI GenBank database. These sequences were aligned by the Clustal W program implemented in MEGA with default parameters. Sequences including the <sup>pre</sup>NSE/DTE residue and NSE/DTE motif were submitted to MEME web site (<http://meme-suite.org/>) to analyze amino acids frequency at the <sup>pre</sup>NSE/DTE site.

### **Plant materials**

*Salvia miltiorrhiza* (Lamiaceae) and *Artemisia annua* cv. Qiute (Asteraceae) plants were grown in a greenhouse at 25°C under a light intensity of 150  $\mu\text{mol}$  of photons  $\cdot\text{m}^{-2}\cdot\text{s}^{-1}$  and a 14-h light/10-h dark cycle. *Arabidopsis thaliana* (ecotype Columbia-0) (Brassicaceae) plants were grown at 22°C under a long-day photoperiod (16 h light/8 h dark) and *Pogostemon cablin* (Lamiaceae) plants were grown under similar conditions at 26°C. All plants were grown in a nursery at the Shanghai Institute of Plant Physiology and Ecology.

### **Gene isolation, expression, and sequence analysis**

Total RNA was extracted using the Trizol reagent (Invitrogen, Carlsbad, CA), and 1- $\mu\text{g}$  RNA was reverse transcribed into cDNA using an RNA PCR (AMV) kit (TaKaRa). The coding regions of *SmSTPS3*, *AaGAS*, *AtTPS21*, *PTSiso*, and *AaECS* were amplified from the cDNA library of each plant and cloned into the pET32a vector. *Escherichia. coli* BL21 (DE3) was used for protein expression.

### **Mutagenesis and protein preparation**

Site-directed mutagenesis of sesquiterpene synthases was performed by polymerase chain reaction (PCR) as previously reported <sup>[1]</sup> using an overlap extension strategy with the respective primers. The primers used for gene cloning and mutagenesis are listed in Table S2.

After adding 0.5 mM isopropyl  $\beta$ -D-1-thiogalactopyranoside (IPTG) to induce protein expression, *E. coli* BL21 (DE3) cells (50 mL) harboring the recombinant plasmids were incubated overnight at 20°C with shaking (200 rpm). The following day, the cells were collected, resuspended in 7 mL of cell lysis buffer (2.5 mM Tris-HCl, 30 mM NaCl, and 0.2 mM imidazole, pH 7.0), and disrupted using a constant cell disruption system at a pressure of 16.0 Kpsi. The supernatant was centrifuged,

passed through a Ni-NTA spin column (Qiagen) pre-equilibrated with lysis buffer, and washed with 10 mL wash buffer (2.5 mM Tris-HCl, 30 mM NaCl, and 0.4 mM imidazole, pH 7.0). Next, 2 mL of elution buffer (2.5 mM Tris-HCl, 30 mM NaCl, and 40 mM imidazole, pH 7.0) was added and the purified proteins were collected and determined for concentrations using the Bradford method with bovine serum albumin serving as a standard.

### **Enzyme assays**

TPS activities were assayed by adding 10 µg of the purified proteins to 450 µL of reaction buffer [25 mM HEPES (pH 7.0), 5 mM MgCl<sub>2</sub>, 5 mM DTT, and 40 µM FDP] in 2-mL screw-top glass vials (Agilent). The reaction mixture was overlaid with 500 µL of hexane and incubated at 37°C for 4 h. The organic phase was passed through a short column of Na<sub>2</sub>SO<sub>4</sub>, and then subjected to gas chromatography-mass spectrometry analysis (GC-MS: Agilent 6890 Series GC System coupled to an Agilent 5973 Network Mass Selective Detector) at an initial temperature of 60°C (5-min hold), which was subsequently increased to 240°C at 10°C/min. New products were identified by comparing their mass spectra (Fig. S4) and retention indices (Table S6) with those of reported known terpenes<sup>[2-9, 11, 12]</sup> and the National Institute of Standards and Technology (NIST) libraries.

### **Enzyme kinetics**

The kinetic parameters of SmSTPS3, AaGAS, AtTPS21, PTSiso, and the mutant enzymes were determined via a malachite green method by measuring the release of pyrophosphate<sup>[10]</sup>. Briefly, reactions were carried out in 50-µL reaction systems containing 25 mM MES, 25 mM CAPS, 50 mM Tris, 2.5 mU of the coupling enzyme inorganic pyrophosphatase (*Saccharomyces cerevisiae*, Sigma), and 5 mM MgCl<sub>2</sub> at pH 7.5. The reaction was initiated by adding a fixed concentration (10–15 nM) of the purified enzyme. Each assay contained different concentrations of FDP in the range from 1.0 to 100 µM. The reaction was allowed to proceed for 15 min at 30°C and then terminated by adding 12 µL of a malachite green development solution, followed by a further 15-min incubation. A<sub>623</sub> (UV absorbance at 623 nm) was measured using a NanoDrop 2000 microvolume spectrophotometer. One unit of enzyme activity was defined as the amount of enzyme required to produce 1 µmol of product per minute under the aforementioned conditions. Values were obtained using GraphPad Prism 5 based on the fitting to Michaelis–Menten curves.

**Fig. S1** Alignment of 1,10-cyclases. <sup>pre</sup>NSE/DTE residues are outlined in red.

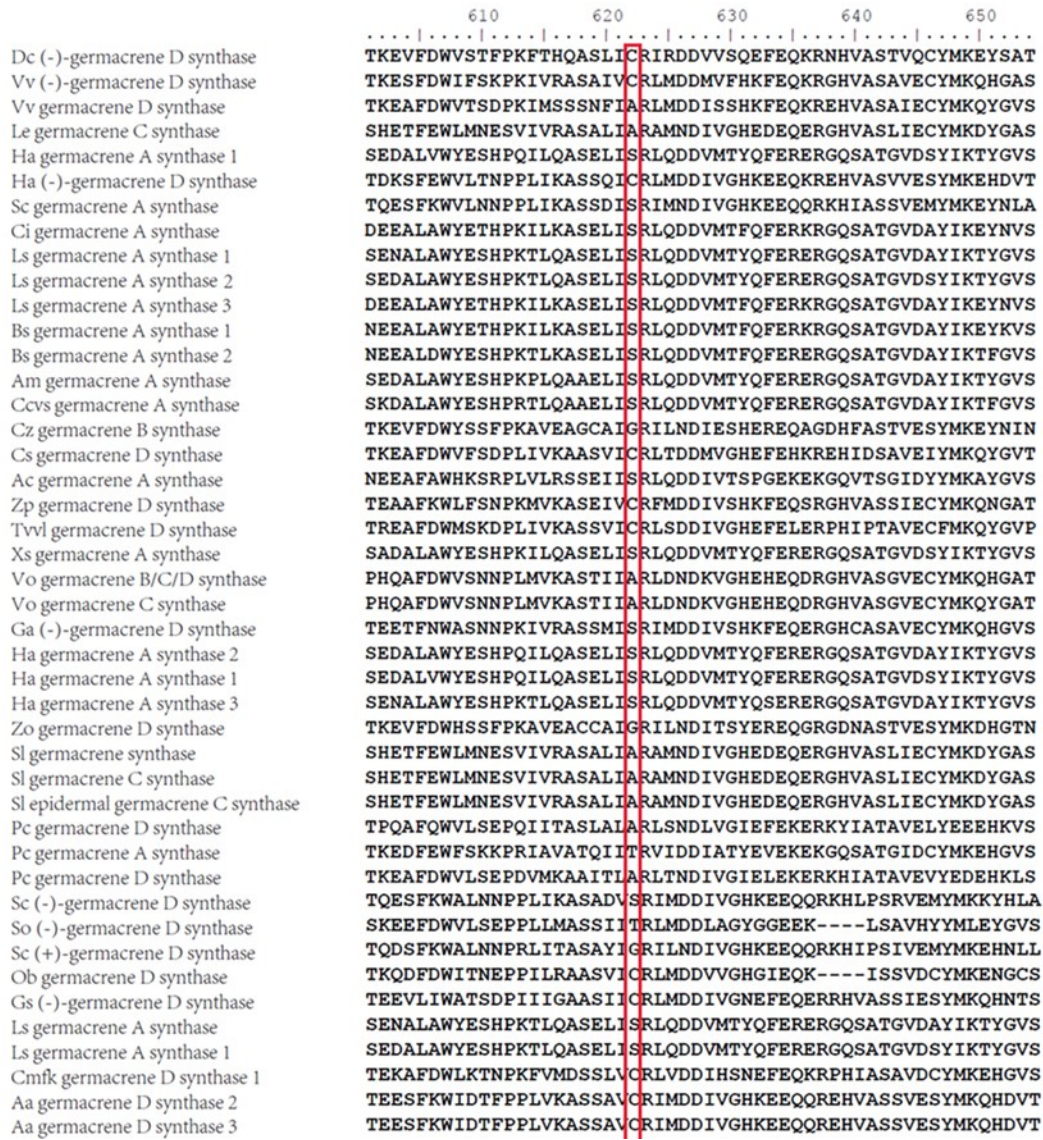



**Fig. S1** continued Alignment of 1,10-cyclases. <sup>pre</sup>NSE/DTE residues are outlined in red.

|                                          |                         |     |                                  |
|------------------------------------------|-------------------------|-----|----------------------------------|
| Aa (-)-germacrene D synthase             | SEDSFKWALTNPLLIKAACA    | CR  | TMDDIVGHKEEKERGHVASFVCEYMKQHNVT  |
| Aa germacrene D synthase 4               | TEESFKWIDTFPPVVKASSAV   | CR  | IMDDIVGHKEEQQRGHVASSVESHMKQHDLT  |
| Aa germacrene A synthase 1               | SEDALAWYESHPKTLQASELI   | SRL | QDDVMTYQFERERERQSATGVDAIKTYGVS   |
| Aa germacrene A synthase 2               | SEDALAWYESHPKTLQASELI   | SRL | QDDVMTYQFERERERQSATGVDAIKTYGVS   |
| Hi (-)-germacrene D synthase             | TKETFWEVWSNEPLIVRASSVI  | CR  | LMDDMVGYGIESK----FTAVECYMNENDAL  |
| Lv germacrene A synthase                 | VREDFEWLSKPKMLVAGLLI    | CR  | VIDD IATYEVEKDRGQIATGIESYMRDNGAT |
| Tp germacrene A synthase                 | SEDALAWYESHPKTLQASELI   | SRL | QDDVMTYQFERERERQSATGVDAIKTYGVS   |
| Cs germacrene A synthase                 | SEHALAWYESHPKTLQASELI   | SRL | QDDVMTYQFERERERQSATGVDSYIKTYGVS  |
| To germacrene A synthase                 | DEEALAWFETHPKILKASELI   | SRL | QDDVMTYQFERERERQSATGVDAIKTYGVS   |
| To germacrene A synthase                 | GEDALAWYESHPKTLQASELI   | SRL | QDDVMTYQFERERERQSATGVDSYIKTYGVS  |
| Do (-)-germacrene D synthase             | KDEVFSWACSPFKIIEIAAIN   | CR  | LMDDIAGHENETLRSYTRRFEMSSTMVNL    |
| Sa germacrene D-4-ol synthase            | SKEAFDWLFSHPVIEASESV    | CR  | LMDDMRSHKFEQERGHVASGIECYMKQYGV   |
| Cn germacrene A synthase                 | GEDALAWYESHPKTLQASELI   | SRL | QDDVMTYQFERERERQSATGVDAIKTYGVS   |
| Pc Germacrene A synthase                 | TKEDFEWFSKPKRIAVATQII   | TR  | VIDD IATYEVEKEKQSATGIDCYMKEHGVS  |
| Hi Bicyclogermacrene synthase            | TEEAFQWVLGSPDPVKAASV    | CR  | LQDDIVGYKFDKQRDHVSAIDCYMKDNINS   |
| Ov Bicyclogermacrene synthase            | SKADFDWIVNEPLIVRASCVI   | CR  | LMDDLVGDEYEEK----PSSVLCYMKQYVVS  |
| Vv (+)-valencene synthase                | TKEAFDWTSDPKIMSSSNFI    | TR  | LMDDIKSHKFEQKRGHVTSAVECYMKQYGV   |
| Cs valencene synthase                    | TKEVFEWISNNPKVVKAAASVI  | CR  | LMDDMQGHEFEQKRGHVASAIECYTKQHGVS  |
| Mn valencene synthase                    | SNDVFKWLFNDPKIVRAAALI   | CR  | LMDDIAGHKFEQERKRVASGVECYMEQYGV   |
| Tu Aristolochene synthase                | GYDVFNWAI SFPKI IENAAMV | SRL | MDDISGHECEKERSNVATAVDCYIKEHGVT   |
| Nt 5-epi-aristolochene Synthase          | TEQDFEWLSKNPKILEASVI    | CR  | VIDD TATYEVEKSRGQIATGIECCMRDYGIS |
| Na 5-epi-aristolochene synthase          | AEQDFEWLSKNPKILEASVI    | CR  | VIDD TATYEVEKSRGQIATGIECCMRDYGVS |
| Cava 5-epi-aristolochene synthase        | KEQQFEWLSKNPKILEGCVTI   | CR  | VIDD IATYEVEKNRGQLSTGIECYMRDYSVS |
| Ca 5-epi-aristolochene synthase          | TEQDFEWLSKNPKILKANATI   | CR  | VIDD IATYEVEKSRGEIATGIECYRREYGV  |
| Sm 5-epieremophilene synthase 1          | VEEDFEWLANKPKMLVAGLLI   | CR  | VIDD IATYEVEKERGQSATGIESYMRDNNAT |
| Sm 5-epieremophilene synthase 2          | VEEDFQWLAKKPKMLVAGLLI   | CR  | VIDD IATYEVEKERGQSATGIESYMRDNNAT |
| Sm 5-epieremophilene synthase 3          | VEEDFQWLAKKPKMLVAGLLI   | CR  | VIDD IATYEVEKERGQSATGIESYMRDNNAT |
| Hm Vetispiradiene Synthase               | TKEHFEWLATNPKILEANATI   | CR  | VDD IATYEVEKGRGQIATGIECYMRDYGVS  |
| Am delta-guaiene synthase                | LKETLDWASTIPEMVKASSLI   | ARY | IDLQTYKAEERGETVSAVRCYMRREYGV     |
| Ac Delta-guaiene synthase                | LKETLDWASTIPEMVKASSLI   | ARY | IDLQTYKAEERGETVSAVRCYMRREYDVS    |
| Tvvl guaiene synthase                    | TVGTCKWATKKPKAVFAAERH   | GRL | LINDIVGYEEHSHRPHVATSIDCYMKEYGVS  |
| Cb hedycaryol synthase                   | TTEAFEWILTTPKPMVAASGAI  | GRL | VDDVMSNDEEQERGHVATGLDCYMKQHGVS   |
| Pc patchoulol synthase                   | TKEAFDWFVSRPFFIEATLI    | AR  | LVDITGHEFEKKREHVRTAVECYMEEHKVG   |
| Pc patchoulol synthase isoform           | TKEAFDWFVSRPFFIEATLI    | AR  | LVDITGCEFENKREHVRTAVECYMEEHKVG   |
| Zmsm beta-selinene synthase              | TREAFEWADSAAPMVLASGEV   | GR  | FLNDMASYKLGKKNKDVANAHECYMKEYGAT  |
| Ob selinene synthase                     | TKKDFDWIRNRPLLQVAEVI    | TR  | MDDIAGHGTEKK----TTAVSCYMKEYECS   |
| Ag Delta-selinene synthase               | PDNILEQIHSPSKILDLELTI   | GRI | ADDLKDFEDEKERGEMASSLQCYMKENPES   |
| At delta-cadinene synthase               | KLDAFEWLSSHPIRVASEII    | SR  | FDDISSYEFEHKREHVATGIDCYMQQFGVS   |
| Vv gamma-cadinene synthase               | TNEAFDWTSDPKIMSSSNFI    | AR  | LMDDIKSHKFEQKRGHVASAVECYMKQYGV   |
| Pd alpha-copaene/delta-cadinene synthase | KREHFDWVLSDPDFVMASCI    | CR  | LADDIVGHEFEQTRDHI PSSVECYTQEHKTS |
| Rc (+)-delta-cadinene synthase           | TKEAYEWASEDPKIRASSIV    | CR  | LMDDIVSHEFEQTRKHVASGVECYIKQYGAS  |
| Ga (+)-delta-cadinene synthase           | TPETFKWAASDPKIKASTII    | CR  | FMDIAEHKFNHRREDDCSAIECYMKQYGV    |
| Gh (+)-delta-cadinene synthase           | TPETFKWAANDPKIIQASTII   | CR  | FMDVTEHKFKHRREDDCSAIECYMEEYGV    |
| Ob Gamma-cadinene synthase               | TQEAIDWIKNEPNFAVKAGLI   | GRY | WDDIGSHKRESKGGEMLTVMDCYMKQYSVS   |
| Cm (+)-gamma-cadinene synthase           | TNEVLQWLSNGPQIIKASTII   | CR  | LMDDIASHKFEQEREHVASAVECYMKQYDCS  |
| Mg Beta-cubebene synthase                | TKEVLEWAIHPTMLRITCSIV   | AR  | LMDDIPSNKLEQERKHVSSSVECYMKEHGTS  |
| Pn copaene synthase                      | TKDVFEWAIKRPNIIVVAASMI  | CR  | NRDDIVGHKEEQERGDVPSGVECYTKDHGCT  |

**Fig. S2** Alignment of 1,11-cyclases. <sup>pre</sup>NSE/DTE residues are outlined in red.

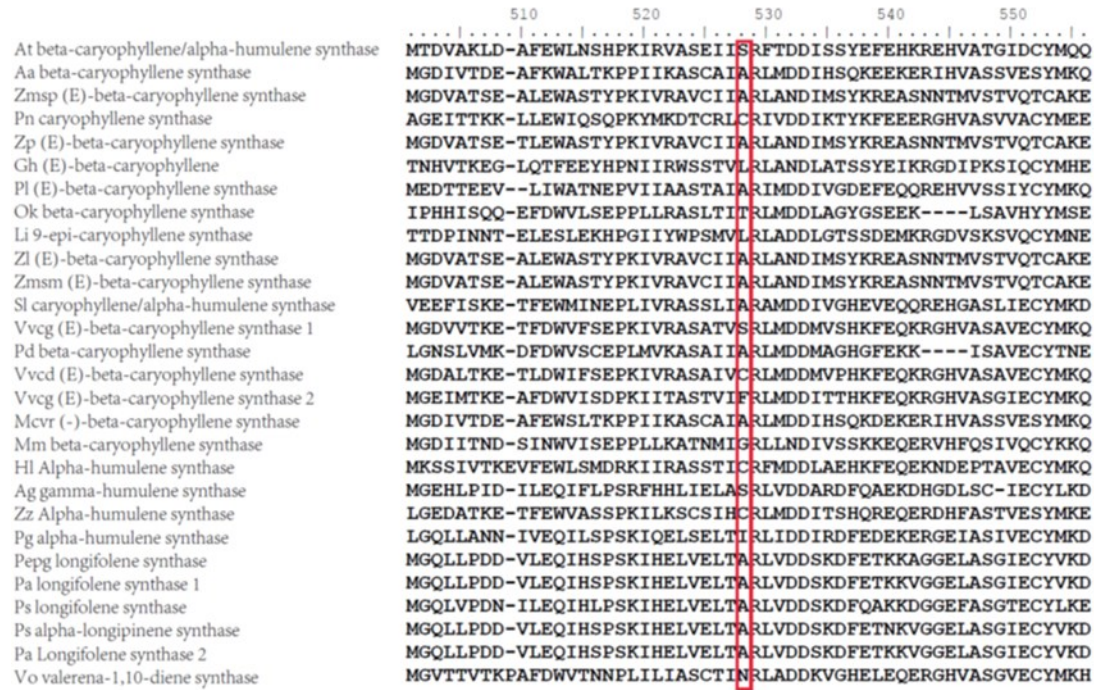



**Fig. S3** Alignment of 1,6 cyclases. <sup>pre</sup>NSE/DTE residues are outlined in red.

|                                      | 710                                       | 720                                            | 730 | 740 |
|--------------------------------------|-------------------------------------------|------------------------------------------------|-----|-----|
| Zm 7-epi-sesquithujene synthase      | ..... ..... ..... ..... ..... ..... ..... | TFEWALSFPPQFIRTFGSEFVRLSNDVVSTKREQTKDHSPTVHCY  |     |     |
| Ag Alpha-bisabolene synthase         |                                           | KVDYPGR-RVLTENLSLISRLADDTKTYKAEKARGELASSIECY   |     |     |
| Zm tps5-Del1                         |                                           | TFEWALSFPPQFIRTFGSEFVRLSNDVVSTKREQTKDHSPTVHCY  |     |     |
| Zo(S)-beta-bisabolene synthase       |                                           | AFEWFASFPKIIEACATIIIRITNDITSMEREQKRAHVASTVDCY  |     |     |
| At (Z)-gamma-bisabolene synthase     |                                           | AYEWRVSRPRLIKSLAAGRLMDDITDFDSDMSNGFAANAINYY    |     |     |
| Gb alpha bisabolene synthase         |                                           | QVDLPGHDPKLIELNCIISRLSDDTKTFQAEKARGELASSIECY   |     |     |
| Pm(E)-gamma-bisabolene synthase      |                                           | KIDYPERSRVLMEQICLISRLADDTQSYKAEKARGELASGIECY   |     |     |
| Sa Beta-bisabolene synthase          |                                           | SAAYVNSVPPPLVRYSGLLNRLYNDLGTSSAEIARGDTLKS IQCY |     |     |
| Ss Alpha-bisabolol synthase          |                                           | SAAYVNSVPPPLVRYSGLLNRLYNDLGTSSAEIARGDTLKS IQCY |     |     |
| Pa E-alpha-bisabolene synthase       |                                           | KVDYPGR-RVLTENLSLISRLADDTKTYKAEKARGELASSIECY   |     |     |
| Zo (S)-beta-bisabolene synthase      |                                           | AFEWFASFPKIIEACATIIIRITNDITSMEREQKRAHVASTVDCY  |     |     |
| Sb Beta-sesquiphellandrene synthase  |                                           | ILDWLLSYPKLLKSMTTFFVRLSNDIASTKREQTGGHHAHVQCY   |     |     |
| Ss a-bisabolol synthase              |                                           | SAAYVNSVPPPLVRYSGLLNRLYNDLGTSSAEIARGDTLKS IQCY |     |     |
| Zo sesquiterpene synthase            |                                           | AFEWFASFPKIVEACAIIVRITNDITSKEREQKREHVASTVDCY   |     |     |
| Ag E-alpha-bisabolene synthase       |                                           | KVDYPGR-RVLTENLSLISRLADDTKTYKAEKARGELASSIECY   |     |     |
| Sa b-bisabolene synthase             |                                           | SAAYVNSVPPPLVRYSGLLNRLYNDLGTSSAEIARGDTLKS IQCY |     |     |
| Ha (Z)-gamma-bisabolene synthase K11 |                                           | IFKWLSNYPPIVKASSLILRYMNDLSTRKDEQERNHVASSVKCY   |     |     |
| Ha (Z)-gamma-bisabolene synthase K7  |                                           | IFKWLSNYPPIVKASSLILRYMNDLSTRKDEQERNHVASSVKCY   |     |     |
| Zm (S)-beta-macrocarpene synthase 1  |                                           | IMKWVMSDAELVKSFGIFVRLSNDIVSTKREQREKHCVSTVQCY   |     |     |
| Zm(S)-beta-macrocarpene synthase 2   |                                           | IMEWVMSDAELVKSFGIFVRLSNDIVSTKREQREKHCVSTVQCY   |     |     |
| Ee bisabolol synthase                |                                           | TFKWVATHPPPLVKASCLILRLMDDIATHKEEQERGHVASSIECY  |     |     |
| Pd(+)-epi-alpha-bisabolol synthase   |                                           | HILDRLTNPPVIKWVSIIVRLADDLGTSTDELKRGDNPKSIQCH   |     |     |
| Aa bisabolol synthase                |                                           | AFEWAVSEPPPLRYKGIIGRRLNDLAGHKKEEQERKVVSSSVESY  |     |     |
| Am (+)-alpha-bisabolol synthase      |                                           | AWEWAVSEPPPLRYKGIIGRRLNDLAGHKKEEQERKVVSSSVESY  |     |     |
| Ak (+)-alpha-bisabolol synthase      |                                           | AWEWAVSEPPPLRYKGIIGRRLNDLAGHKKEEQERKVVSSSVESY  |     |     |
| Mcvr a-bisabolol synthase            |                                           | AFKWVATHPPIVKAACKILRLMDDIATHKEEQERGHVASSIECY   |     |     |
| Aabs koidzumiol synthase             |                                           | AWEWAVSEPPPLFRYSGILGRRLNDLVSHKDEQERKHISSSVESY  |     |     |
| Aabs koidzumiol synthase             |                                           | AWEWAVSEPPPLFRYSGILGRRLNDLVSHKDEQERKHISSSVESY  |     |     |
| Aa Amorpha-4,11-diene synthase       |                                           | SVEWAVSAPPLFRYSGILGRRLNDLMTHKAEQERKHSSSSLESY   |     |     |
| Aa epi-cedrol synthase               |                                           | SFEWVFTNPPLVNACLLCRTMDDLGSKGGEQDRKQHVASTIECY   |     |     |
| Mcvr sesquiterpene synthase 1        |                                           | AFKWVATHPPIVKAACKILRLMDDIATHKEEQERGHVASSIECY   |     |     |
| Mcvr sesquiterpene synthase 4        |                                           | PFKWALANPPLVRATCAICRFMDDIVGHEDEQQRNHVSVVECY    |     |     |
| Vvcpn beta-curcumenene synthase      |                                           | AFDWVLNGPKIVRACSTIIRLMDDMASHKFEQERGHVASSVECY   |     |     |
| Pc Gamma-curcumenene synthase        |                                           | NIDWLLSQPRLASSTAIVMRCCNDLGSNQRESKGGVMTSLDCY    |     |     |
| Vvcg (E)-alpha-bergamotene synthase  |                                           | VFDWLQONPKIVRASSKVIIRLMDDMATHKFEQERGHVASSIECY  |     |     |
| Pd Trans-alpha-bergamotene synthase  |                                           | ELQYLEQYPGIIRWPSTVLRRLADDLGTASDEIKRGDVPKSIQCY  |     |     |
| Sa santalene bergamotene synthase 1  |                                           | ALDKVHPLPDLHYSSLLSRLINDMGTSSDELERGDNLKSIQCY    |     |     |
| Sa santalene bergamotene synthase 2  |                                           | ALDKVHPLPDLHYSSLLSRLINDIGTSPDEMARGDNLKSIHCY    |     |     |
| Ss santalene synthase                |                                           | ALDKVHPLPDLHYSSLLSRLINDMGTSPDEMARGDNLKSIHCY    |     |     |
| Sau santalene synthase               |                                           | ALDKVHPLPDLHYSSLLSRLINDIGTSPDEMARGDNLKSIHCY    |     |     |
| Sb Zingiberene synthase              |                                           | VLDWLLTYPELLKCFITFFVRLSNDITSTKREQTGGHHAHVQCY   |     |     |
| Ob Alpha-zingiberene synthase        |                                           | ELQSLERHAHSL---SMILRLADDLGTSSDEMKRGDVPKAIQCF   |     |     |
| At Alpha-barbatene synthase          |                                           | AFEWLI SRPKLVRI LGAKTRLMDDIADFEEDMEKGYTANALNYY |     |     |



**Fig. S4** Mass spectra of products generated by enzymes used in the manuscript. The most of sesquiterpenes are yielded by Wt enzymes [2-7], and by compared with known terpenes in reported enzyme assay [8, 9].

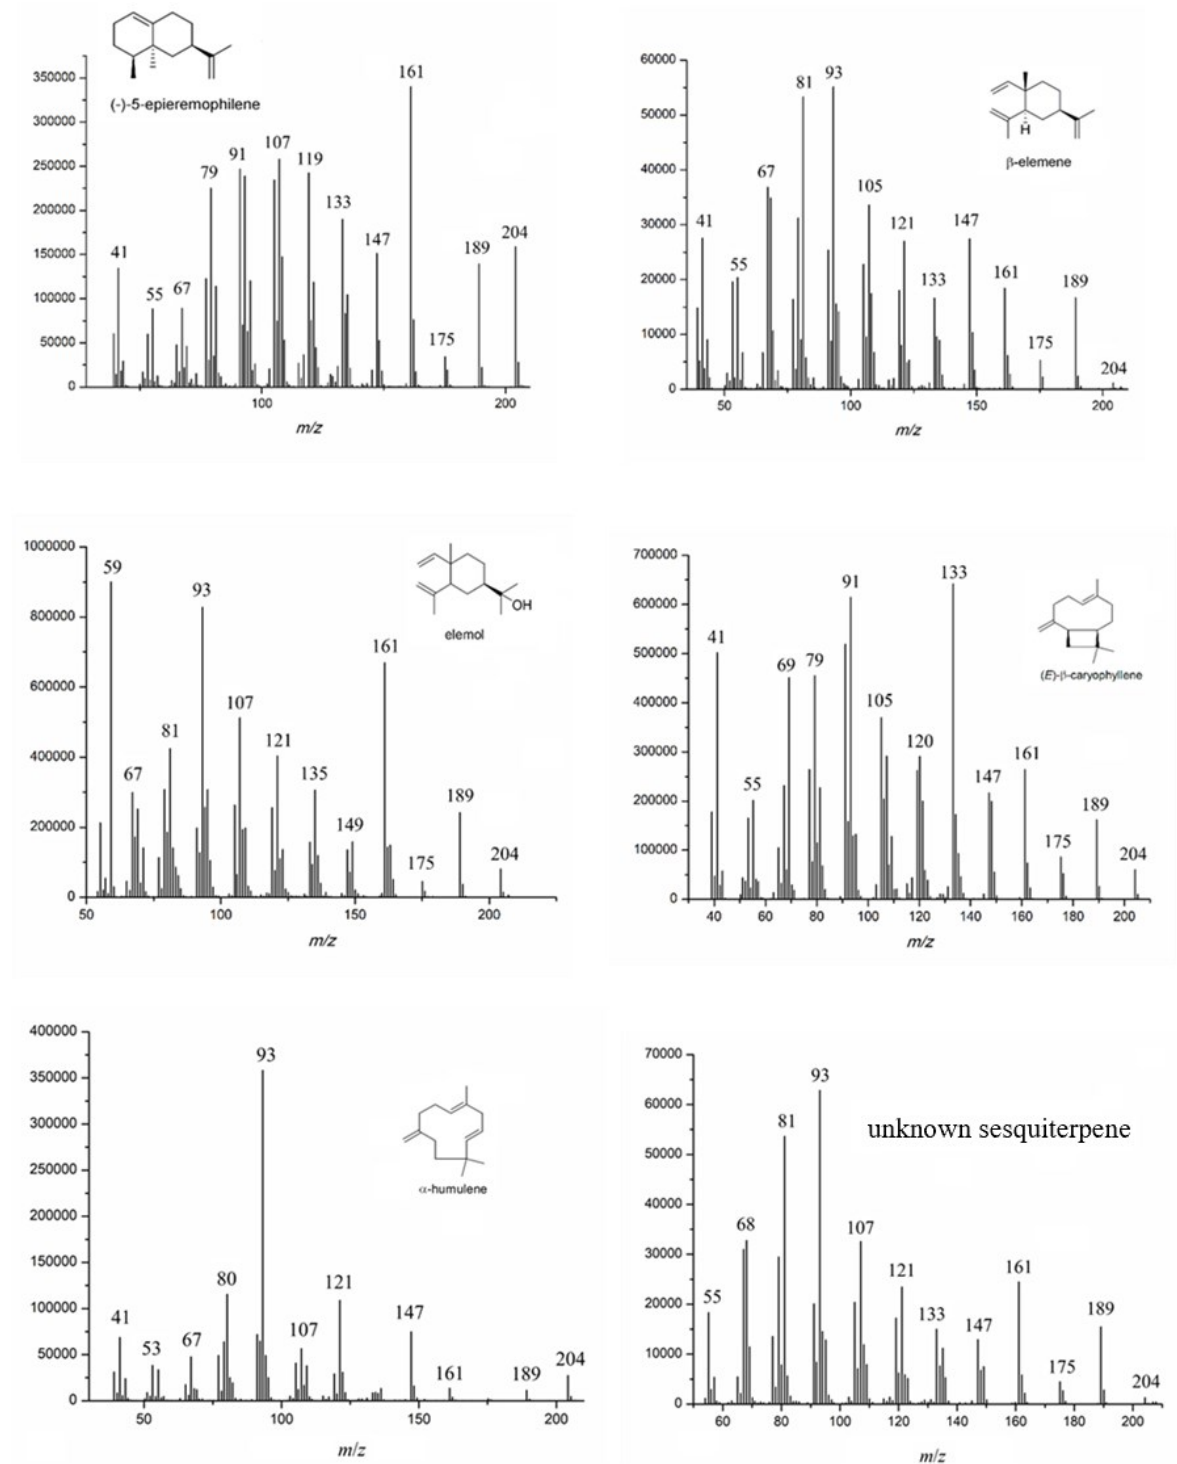

**Fig. S4 continued** Mass spectra of products generated by enzymes used in the manuscript.

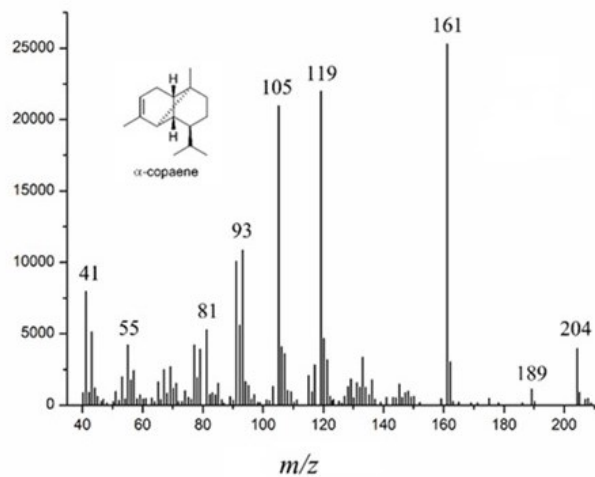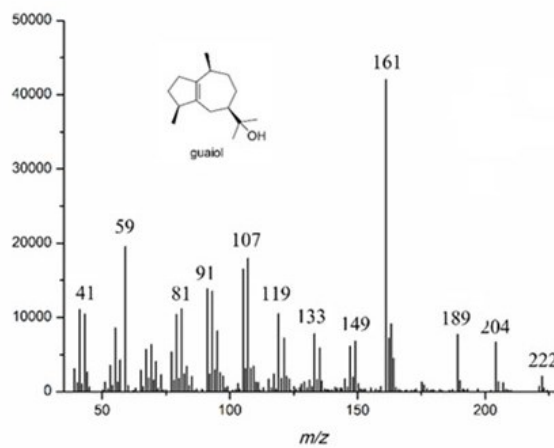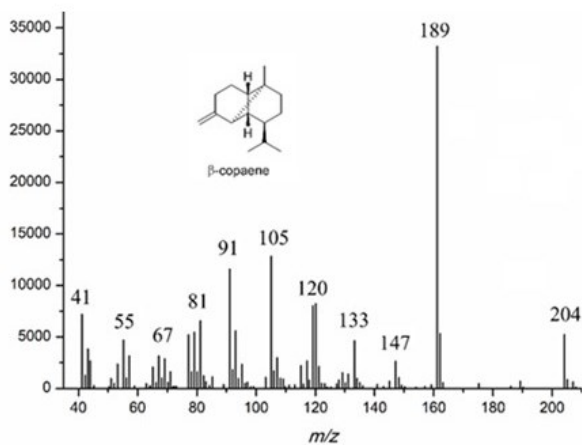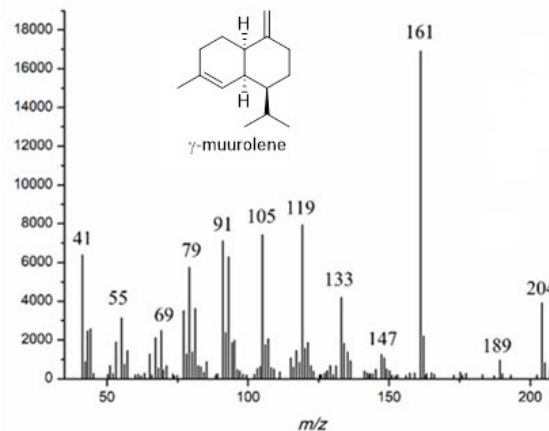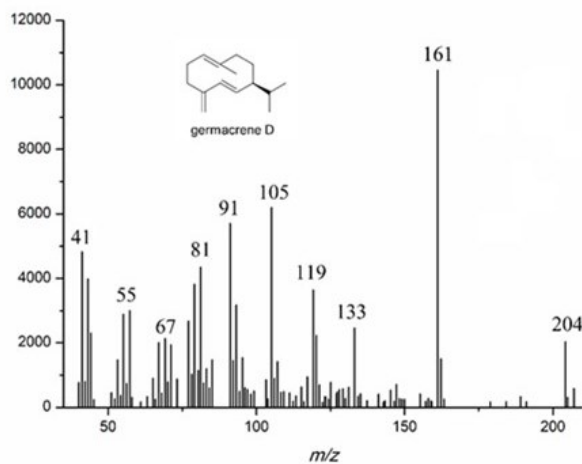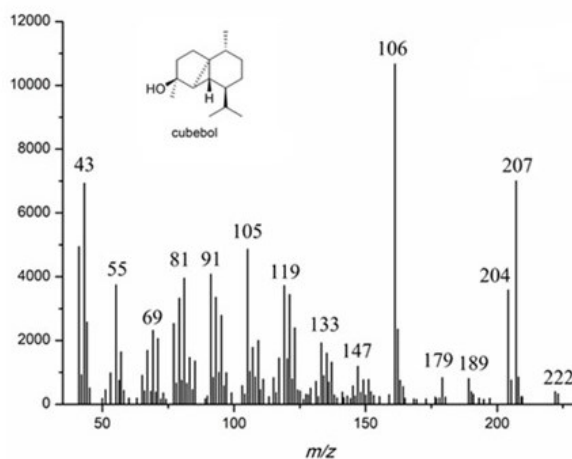

**Fig. S4 continued** Mass spectra of products generated by enzymes used in the manuscript.

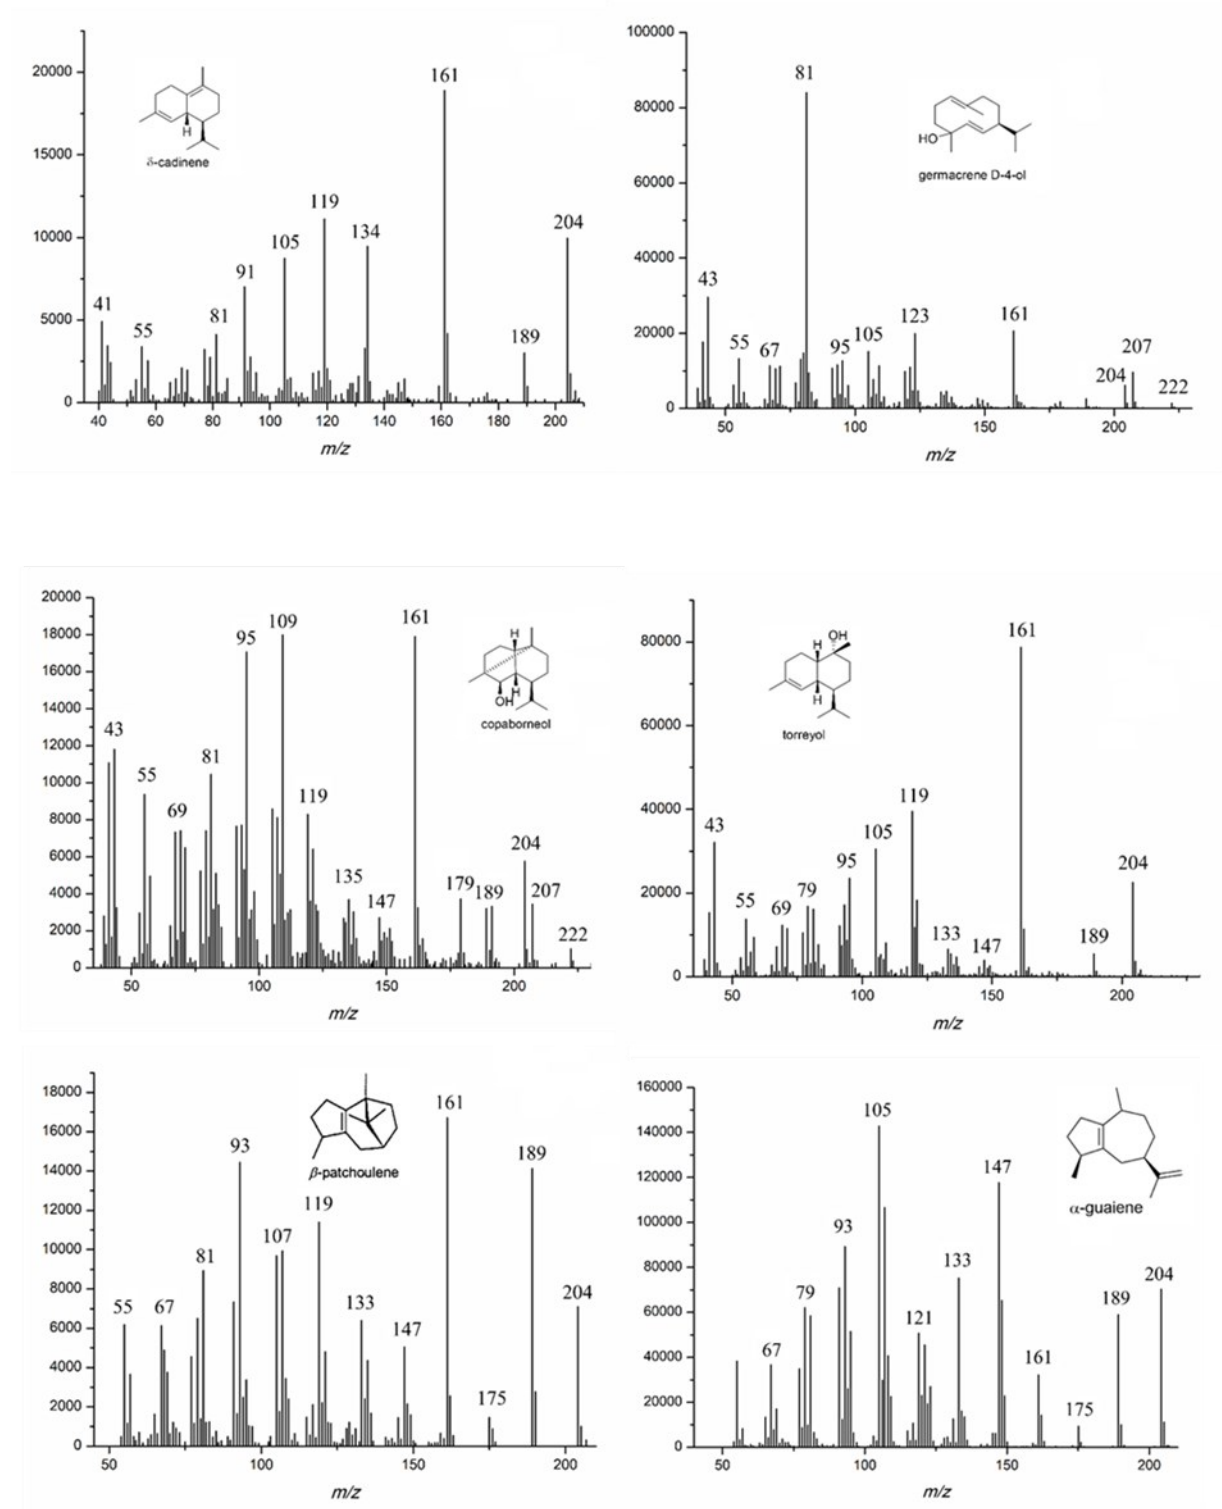



**Fig. S4 continued** Mass spectra of products generated by enzymes used in the manuscript.

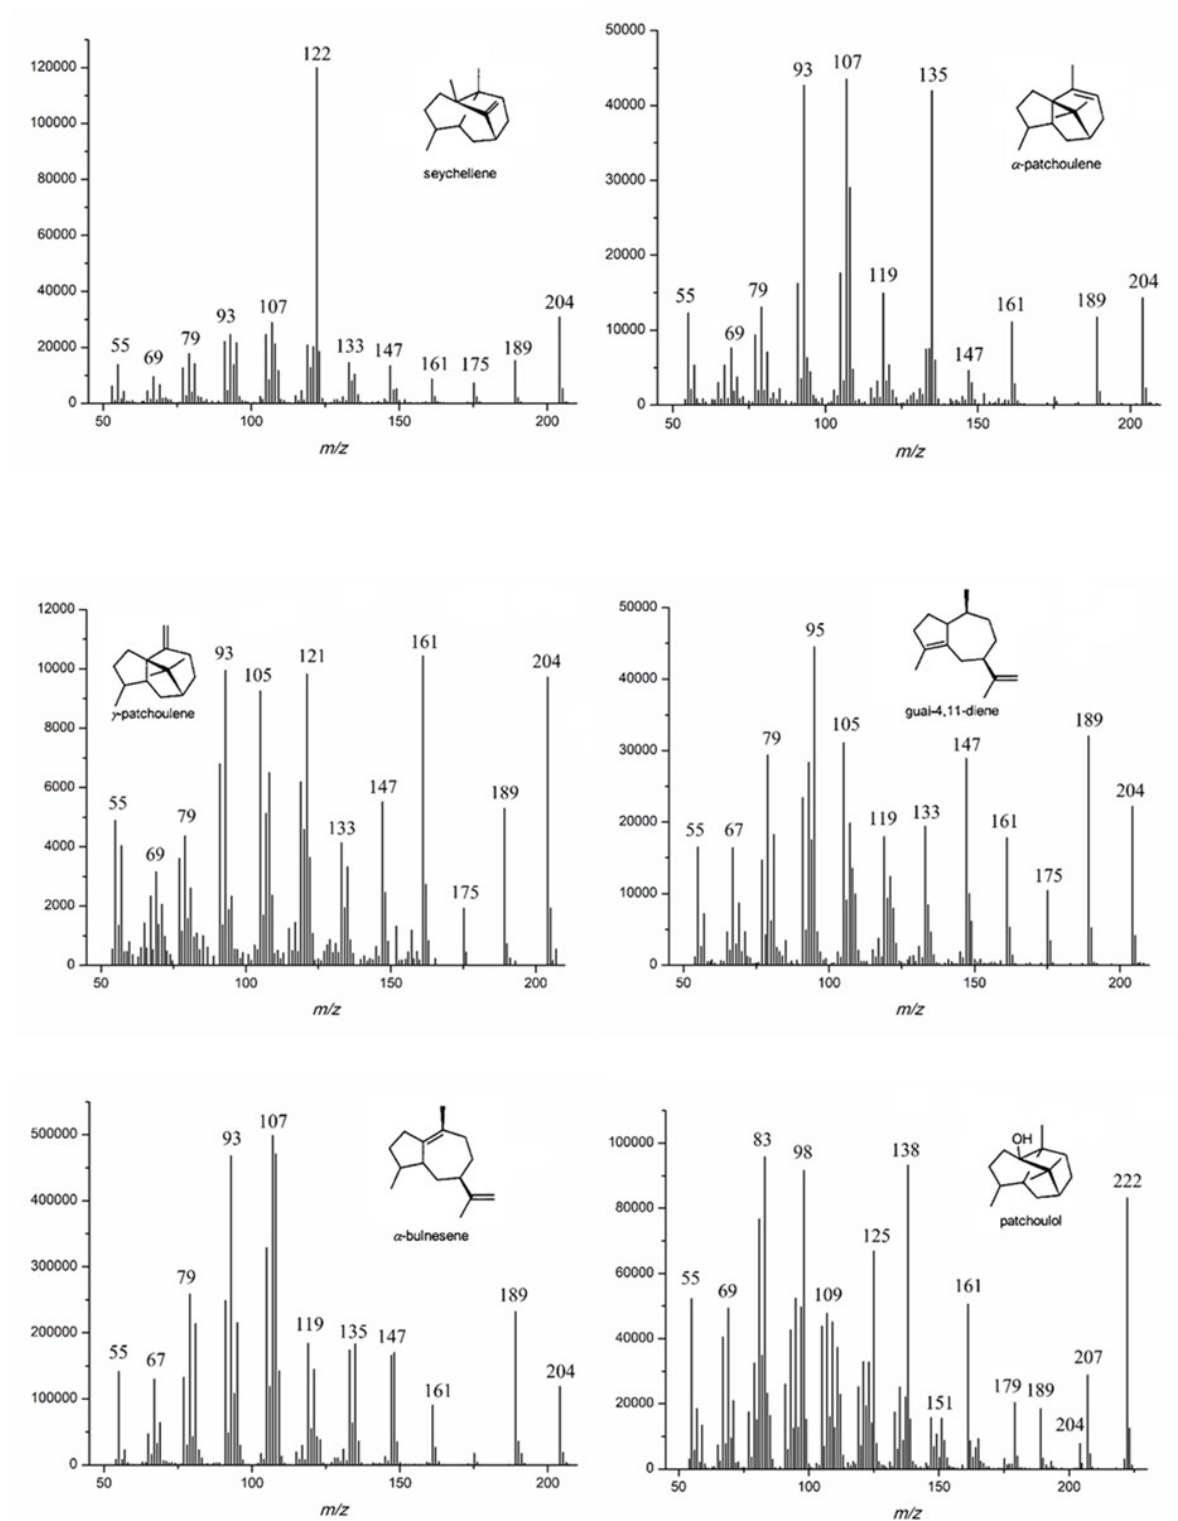

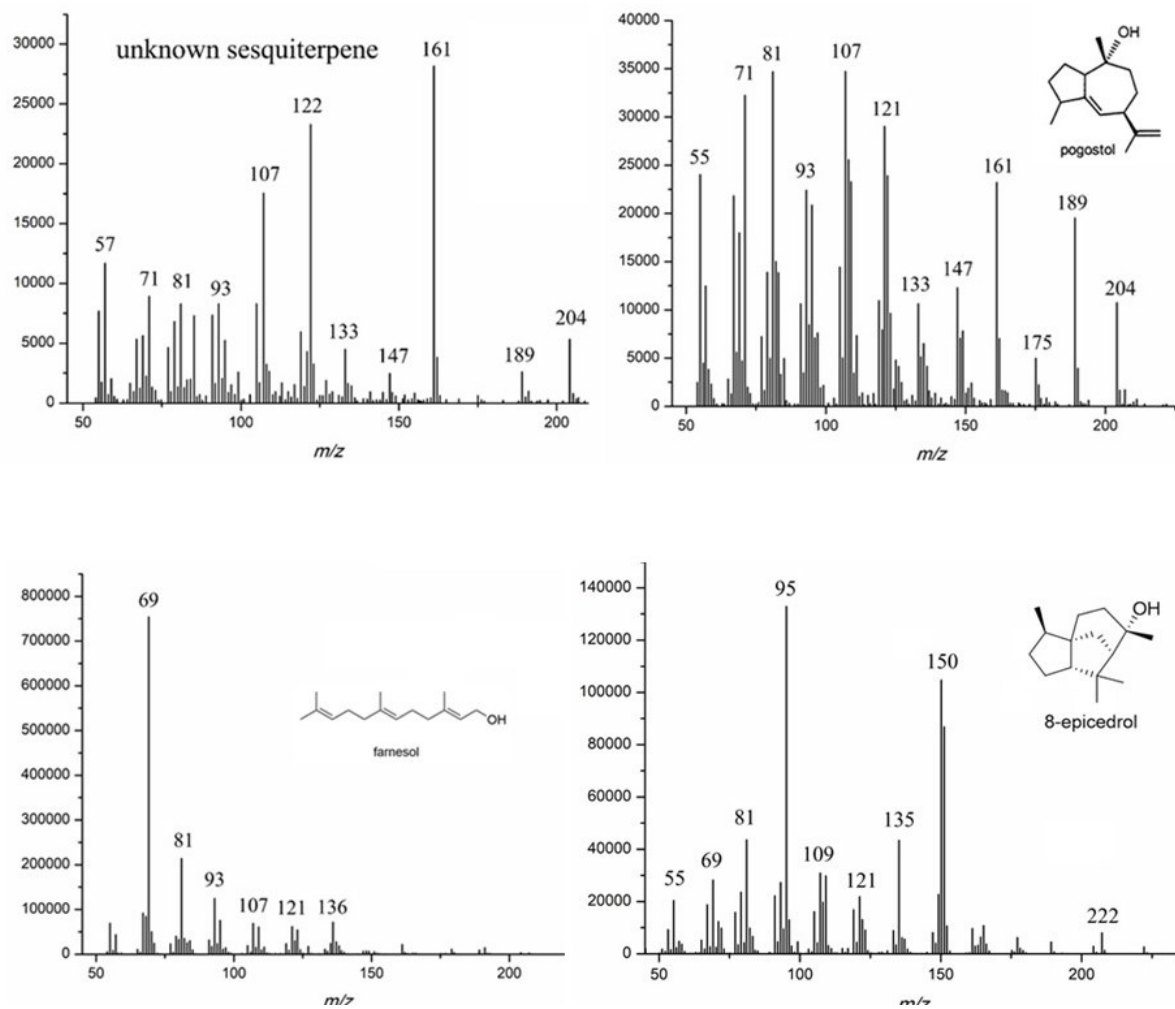

**Fig. S4 continued** Mass spectra of products generated by enzymes used in the manuscript.

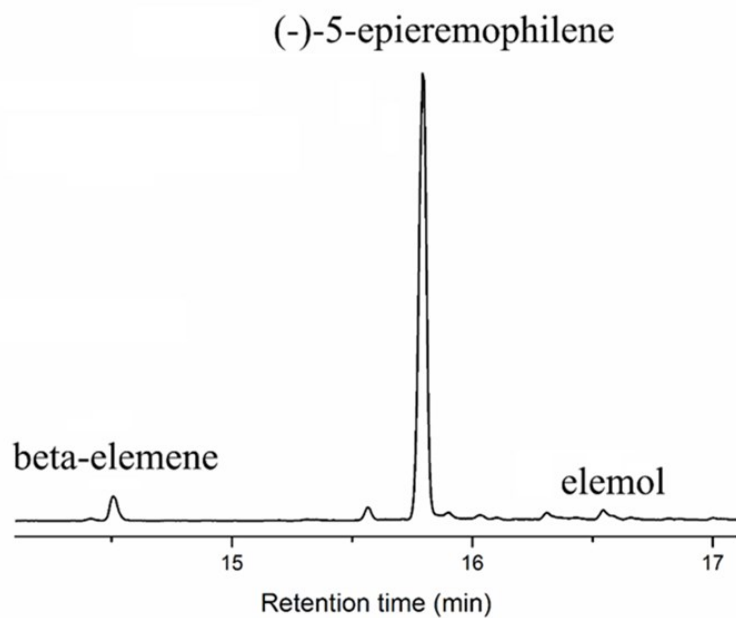

**Fig. S5** Effect of substitution of Cys at <sup>pre</sup>NSE/DTE position of SmSTPS3 with Ser.

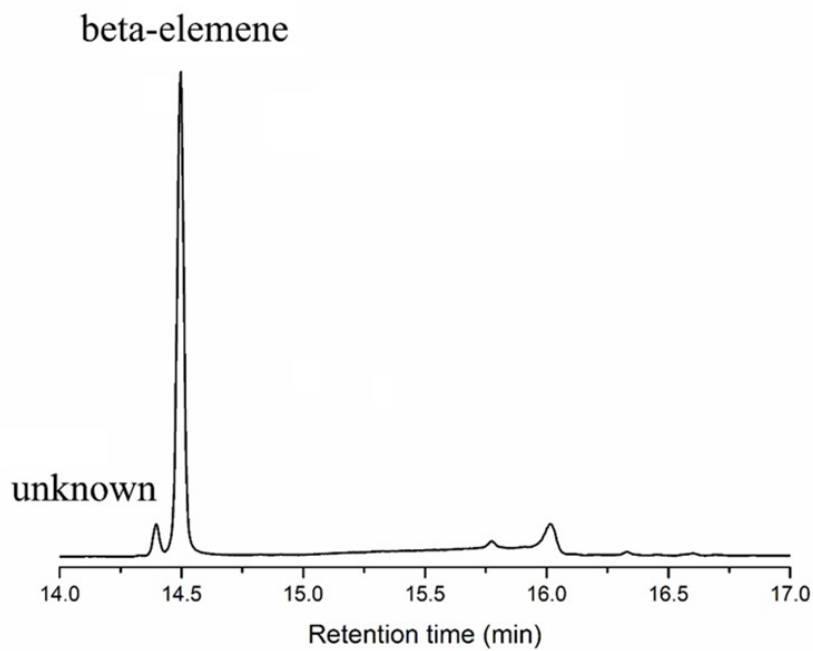

**Fig. S6** Effect of substitution of Ser at <sup>pre</sup>NSE/DTE position of AaGAS with Cys.



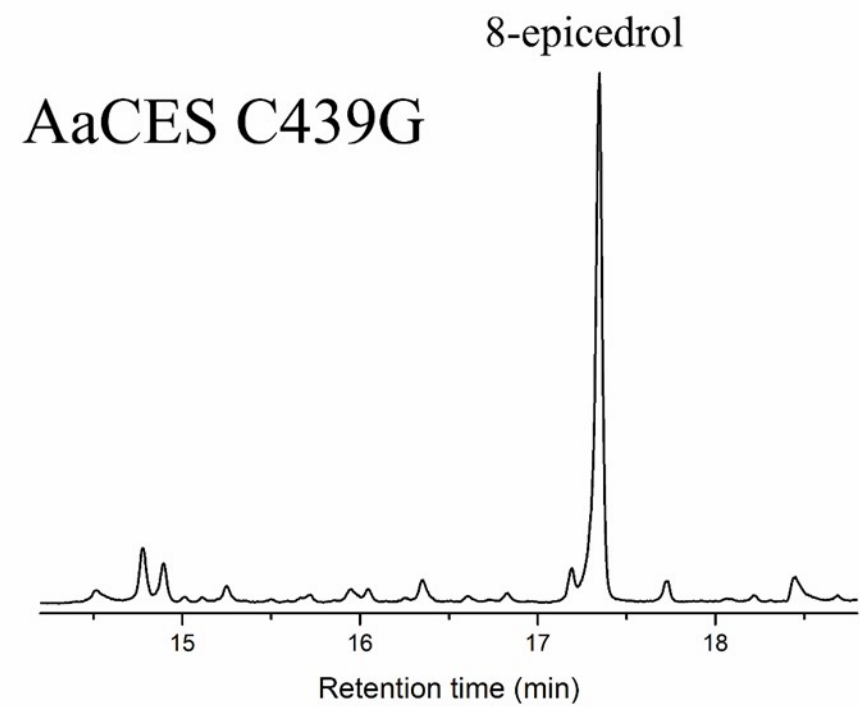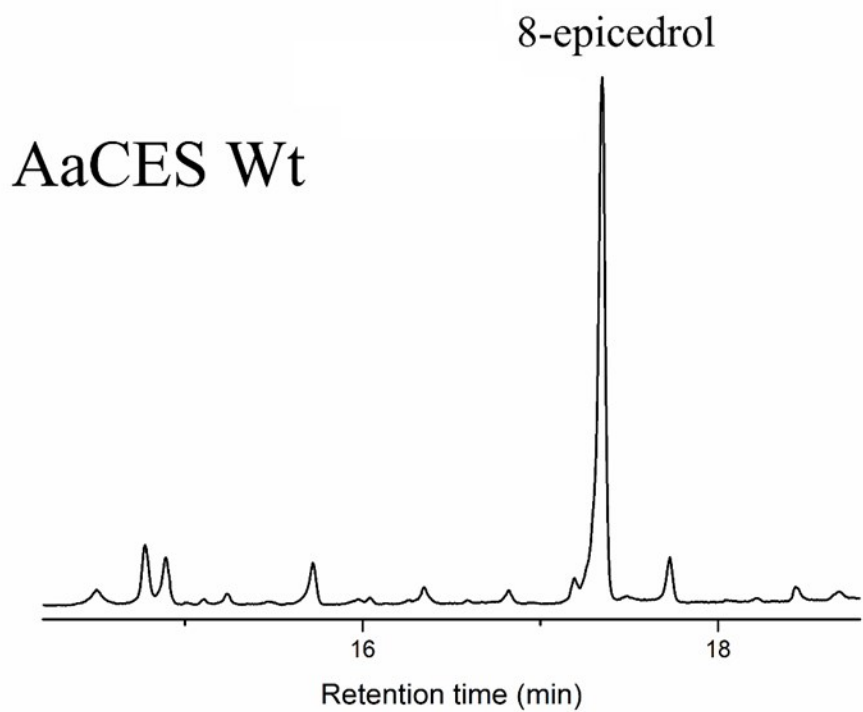

**Fig. S7** Effect of substitution of Cys at <sup>pre</sup>NSE/DTE position of AaCES with Gly.

**Table S1** Plant sesquiterpene synthases used for the phylogenetic analysis, their corresponding protein ids, and organism names.

| Sesquiterpene Synthases            | Protein ID  | Organism                                                |
|------------------------------------|-------------|---------------------------------------------------------|
| Dc (-)-germacrene D synthase       | PKU80372.1  | <i>Dendrobium catenatum</i> (Orchidaceae)               |
| Vv (-)-germacrene D synthase       | AY561842.1  | <i>Vitis vinifera</i> (Vitaceae)                        |
| Vv germacrene D synthase           | HM807378.1  | <i>Vitis vinifera</i> (Vitaceae)                        |
| Le germacrene C synthase           | AF035631.1  | <i>Lycopersicon esculentum</i> cv. VFNT (Solanaceae)    |
| Ha germacrene A synthase 1         | AAAY41421.2 | <i>Helianthus annuus</i> (Asteraceae)                   |
| Ha (-)-germacrene D synthase       | OTG28618.1  | <i>Helianthus annuus</i> (Asteraceae)                   |
| Sc germacrene A synthase           | CAC36896.1  | <i>Solidago canadensis</i> (Asteraceae)                 |
| Ci germacrene A synthase           | AAM21658.1  | <i>Cichorium intybus</i> (Asteraceae)                   |
| Ls germacrene A synthase 1         | AF489965.1  | <i>Lactuca sativa</i> (Asteraceae)                      |
| Ls germacrene A synthase 2         | AF489964.1  | <i>Lactuca sativa</i> (Asteraceae)                      |
| Ls germacrene A synthase 3         | AOT80657.1  | <i>Lactuca sativa</i> (Asteraceae)                      |
| Bs germacrene A synthase 1         | AIX97167.1  | <i>Barnadesia spinosa</i> (Asteraceae)                  |
| Bs germacrene A synthase 2         | AIX97168.1  | <i>Barnadesia spinosa</i> (Asteraceae)                  |
| Am germacrene A synthase           | AGD80135.1  | <i>Achillea millefolium</i> (Asteraceae)                |
| Ccvs germacrene A synthase         | AET95645.1  | <i>Cynara cardunculus</i> var. scolymus (Asteraceae)    |
| Cz germacrene B synthase           | BBE32340.1  | <i>Curcuma zedoaria</i> (Zigiberaceae)                  |
| Cs germacrene D synthase           | BBE32332.1  | <i>Chengiopanax sciadophylloides</i> (Araliaceae)       |
| Ac germacrene A synthase           | BBE38101.1  | <i>Aralia cordata</i> (Araliaceae)                      |
| Zp germacrene D synthase           | BBD88589.1  | <i>Zanthoxylum piperitum</i> (Rutaceae)                 |
| Tvvl germacrene D synthase         | AMU19318.1  | <i>Thapsia villosa</i> var. <i>laciniata</i> (Apiaceae) |
| Xs germacrene A synthase           | AJT60315.1  | <i>Xanthium strumarium</i> (Asteraceae)                 |
| Vo germacrene B/C/D synthase       | AFR42417.1  | <i>Valeriana officinalis</i> (Valerianaceae)            |
| Vo germacrene C synthase           | AGB05616.1  | <i>Valeriana officinalis</i> (Valerianaceae)            |
| Ga (-)-germacrene D synthase       | KHG04103.1  | <i>Gossypium arboreum</i> (Malvaceae)                   |
| Ha germacrene A synthase 2         | EU327785.1  | <i>Helianthus annuus</i> (Asteraceae)                   |
| Ha germacrene A synthase 1         | DQ016667.2  | <i>Helianthus annuus</i> (Asteraceae)                   |
| Ha germacrene A synthase 3         | GU176380.1  | <i>Helianthus annuus</i> cultivar HA300 (Asteraceae)    |
| Zo germacrene D synthase           | AAX40665.1  | <i>Zingiber officinale</i> (Zigiberaceae)               |
| Sl germacrene synthase             | AEM05858.1  | <i>Solanum lycopersicum</i> (Solanaceae)                |
| Sl germacrene C synthase           | AAC39432.1  | <i>Solanum lycopersicum</i> (Solanaceae)                |
| Sl epidermal germacrene C synthase | AAC39431.1  | <i>Solanum lycopersicum</i> (Solanaceae)                |
| Pc germacrene D synthase           | AY508729.1  | <i>Pogostemon cablin</i> (Lamiaceae)                    |
| Pc germacrene A synthase           | AY508728.1  | <i>Pogostemon cablin</i> (Lamiaceae)                    |
| Pc germacrene D synthase           | AY508727.1  | <i>Pogostemon cablin</i> (Lamiaceae)                    |
| Sc (-)-germacrene D synthase       | AAR31145.1  | <i>Solidago canadensis</i> (Asteraceae)                 |
| So (-)-germacrene D synthase       | AQY54367.1  | <i>Salvia officinalis</i> (Lamiaceae)                   |
| Sc (+)-germacrene D synthase       | AAR31144.1  | <i>Solidago canadensis</i> (Asteraceae)                 |
| Ob germacrene D synthase           | AAV63786.1  | <i>Ocimum basilicum</i> (Labiatae)                      |
| Gs (-)-germacrene D synthase       | RZB75747.1  | <i>Glycine soja</i> (Fabaceae)                          |
| Ls germacrene A synthase 2         | AAM11627.1  | <i>Lactuca sativa</i> (Asteraceae)                      |
| Ls germacrene A synthase 1         | AAM11626.1  | <i>Lactuca sativa</i> (Asteraceae)                      |
| Cmfk germacrene D synthase 1       | RWR76602.1  | <i>Cinnamomum micranthum</i> f. <i>kanehirae</i>        |
| Aa germacrene D synthase 2         | PWA81675.1  | <i>Artemisia annua</i> (Asteraceae)                     |
| Aa germacrene D synthase 3         | PWA51042.1  | <i>Artemisia annua</i> (Asteraceae)                     |

|                                               |                |                                                         |
|-----------------------------------------------|----------------|---------------------------------------------------------|
| Aa (-)-germacrene D synthase                  | PWA68010.1     | <i>Artemisia annua</i> (Asteraceae)                     |
| Aa germacrene D synthase 4                    | PWA58326.1     | <i>Artemisia annua</i> (Asteraceae)                     |
| Aa germacrene A synthase 1                    | DQ447636.1     | <i>Artemisia annua</i> (Asteraceae)                     |
| Aa germacrene A synthase 2                    | PWA48097.1     | <i>Artemisia annua</i> (Asteraceae)                     |
| Hi (-)-germacrene D synthase                  | PIN14350.1     | <i>Handroanthus impetiginosus</i> (Bignoniaceae)        |
| Lv germacrene A synthase                      | AGN72806.1     | <i>Lavandula viridis</i> (Lamiaceae)                    |
| Tp germacrene A synthase                      | AEH41844.1     | <i>Tanacetum parthenium</i> (Asteraceae)                |
| Cs germacrene A synthase                      | ABB00361.1     | <i>Crepidiastrum sonchifolium</i> (Asteraceae)          |
| To germacrene A synthase                      | ALY05869.1     | <i>Taraxacum officinale</i> (Asteraceae)                |
| To germacrene A synthase                      | ALY05868.1     | <i>Taraxacum officinale</i> (Asteraceae)                |
| Do (-)-germacrene D synthase                  | OEL12694.1     | <i>Dichantherium oligosanthes</i> (Poaceae)             |
| Sa germacrene D-4-ol synthase                 | B5A435.1       | <i>Santalum album</i> (Santalaceae)                     |
| Cn germacrene A synthase                      | AMN10097.1     | <i>Chamaemelum nobile</i> (Asteraceae)                  |
| Pc germacrene A synthase                      | Q49SP5.1       | <i>Pogostemon cablin</i> (Lamiaceae)                    |
| Hi bicyclogermacrene synthase                 | PIN24805.1     | <i>Handroanthus impetiginosus</i> (Bignoniaceae)        |
| Ov bicyclogermacrene synthase                 | E2E2N7.1       | <i>Origanum vulgare</i> (Lamiaceae)                     |
| Vv (+)-valencene synthase                     | AY561843.1     | <i>Vitis vinifera</i> (Vitaceae)                        |
| Cs valencene synthase                         | AF441124.1     | <i>Citrus sinensis</i> (Rutaceae)                       |
| Mn valencene synthase                         | XP_010092295.1 | <i>Morus notabilis</i>                                  |
| Tu aristolochene synthase                     | EMS62091.1     | <i>Triticum Urartu</i> (Poaceae)                        |
| Nt 5-epi-aristolochene Synthase               | 5EAU_A         | <i>Nicotiana tabacum</i> (Asteraceae)                   |
| Na 5-epi-aristolochene synthase               | AAP05762.1     | <i>Nicotiana attenuate</i> (Asteraceae)                 |
| Cava 5-epi-aristolochene synthase             | CAA06614.1     | <i>Capsicum annuum</i> var. <i>annuum</i> (Solanaceae)  |
| Ca 5-epi-aristolochene synthase               | NP_001311620.1 | <i>Capsicum annuum</i> (Solanaceae)                     |
| Sm 5-epieremophilene synthase 1               | KY432512.1     | <i>Salvia miltiorrhiza</i> (Lamiaceae)                  |
| Sm 5-epieremophilene synthase 2               | KY432513.1     | <i>Salvia miltiorrhiza</i> (Lamiaceae)                  |
| Sm 5-epieremophilene synthase 3               | KY432514.1     | <i>Salvia miltiorrhiza</i> (Lamiaceae)                  |
| Hm vetispiradiene Synthase                    | 5JO7_D         | <i>Hyoscyamus muticus</i> (Solanaceae)                  |
| Am delta-guaiene synthase                     | ALR84836.1     | <i>Aquilaria malaccensis</i> (Thymelaeaceae)            |
| Ac delta-guaiene synthase                     | D0VMR8.1       | <i>Aquilaria crassna</i> (Thymelaeaceae)                |
| Tvvl guaiene synthase                         | AZL40028.1     | <i>Thapsia villosa</i> var. <i>laciniata</i> (Apiaceae) |
| Cb hedyacryol synthase                        | BAU68096.1     | <i>Camellia brevistyla</i>                              |
| Pc patchoulol synthase                        | AY508730.1     | <i>Pogostemon cablin</i> (Lamiaceae)                    |
| Pc patchoulol synthase variant                | AHL24448.1     | <i>Pogostemon cablin</i> (Lamiaceae)                    |
| Zmsm beta selinene synthase                   | ATI25530.1     | <i>Zea mays</i> subsp. <i>mays</i> (Poaceae)            |
| Ob selinene synthase                          | AAV63785.1     | <i>Ocimum basilicum</i> (Labiatae)                      |
| Ag delta-selinene synthase                    | O64404.1       | <i>Abies grandis</i> (Pinaceae)                         |
| At delta-cadinene synthase                    | AJ544238.1     | <i>Arabidopsis thaliana</i> (Brassicaceae)              |
| Vv gamma-cadinene synthase                    | HM807380.1     | <i>Vitis vinifera</i> (Vitaceae)                        |
| Pd alpha-copaene/delta-cadinene synthase      | AFR23368.1     | <i>Phyla dulcis</i> (Verbenaceae)                       |
| Rc (+)-delta-cadinene synthase                | B9S9Z3.1       | <i>Ricinus communis</i> (Euphorbiaceae)                 |
| Ga (+)-delta-cadinene synthase                | Q43714.1       | <i>Gossypium arboreum</i> (Malvaceae)                   |
| Gh (+)-delta-cadinene synthase                | U88318.1       | <i>Gossypium hirsutum</i> (Malvaceae)                   |
| Ob gamma-cadinene synthase                    | Q5SBP5.1       | <i>Ocimum basilicum</i> (Labiatae)                      |
| Cm (+)-gamma-cadinene synthase                | B2KSJ5.1       | <i>Cucumis melo</i> (Cucurbitaceae)                     |
| Mg beta-cubebene synthase                     | B3TPQ6.1       | <i>Magnolia grandiflora</i> (Magnoliaceae)              |
| Pn copaene synthase                           | AVY53326.1     | <i>Piper nigrum</i> (Piperaceae)                        |
| At beta-caryophyllene/alpha-humulene synthase | AF497491.1     | <i>Arabidopsis thaliana</i> (Brassicaceae)              |
| Aa beta-caryophyllene synthase                | AF472361.1     | <i>Artemisia annua</i> (Asteraceae)                     |
| Zmsp (E)-beta-caryophyllene synthase          | EU259642.1     | <i>Zea mays</i> subsp. <i>Parviglumis</i> (Poaceae)     |



|                                          |                |                                                                            |
|------------------------------------------|----------------|----------------------------------------------------------------------------|
| Pn caryophyllene synthase                | ARB08605.1     | <i>Piper nigrum</i> (Piperaceae)                                           |
| Zp (E)-beta-caryophyllene synthase       | ABY79214.1     | <i>Zea perennis</i> (Poaceae)                                              |
| Gh (E)-beta-caryophyllene                | XP_016727799.1 | <i>Gossypium hirsutum</i> (Malvaceae)                                      |
| Pl (E)-beta-caryophyllene synthase       | ARQ83254.1     | <i>Phaseolus lunatus</i> (Fabaceae)                                        |
| Ok beta-caryophyllene synthase           | AKA94109.1     | <i>Ocimum kilimandscharicum</i> (Labiatae)                                 |
| Li 9-epi-caryophyllene synthase          | AGU13712.1     | <i>Lavandula x intermedia</i> (Lamiaceae)                                  |
| Zl (E)-beta-caryophyllene synthase       | ABY79211.1     | <i>Zea luxurians</i> (Poaceae)                                             |
| Zmsm (E)-beta-caryophyllene synthase     | EU259641.1     | <i>Zea mays subsp. Mexicana</i> (Poaceae)                                  |
| Sl caryophyllene/alpha-humulene synthase | GU647162.1     | <i>Solanum lycopersicum</i> (Solanaceae)                                   |
| Vvcg (E)-beta-caryophyllene synthase 1   | HM807374.1     | <i>Vitis vinifera</i> (Vitaceae)                                           |
| Pd beta-caryophyllene synthase           | AFR23370.1     | <i>Phyla dulcis</i> (Verbenaceae)                                          |
| Vvcd (E)-beta-caryophyllene synthase     | JF808010.1     | <i>Vitis vinifera</i> cultivar deying 84-1 (Vitaceae)                      |
| Vvcg (E)-beta-caryophyllene synthase 2   | HM807373.1     | <i>Vitis vinifera</i> isolate VvGwECar1 cultivar Gewurztraminer (Vitaceae) |
| Mcvr (-)-beta-caryophyllene synthase     | I6RAQ6.1       | <i>Matricaria chamomilla</i> var. recutita                                 |
| Mm beta-caryophyllene synthase           | ACN67535.1     | <i>Mikania micrantha</i> (Asteraceae)                                      |
| Hl alpha-humulene synthase               | B6SCF5.1       | <i>Humulus lupulus</i> (Cannabaceae)                                       |
| Ag gamma-humulene synthase               | AAC05728.1     | <i>Abies grandis</i> (Pinaceae)                                            |
| Zz alpha-humulene synthase               | B1B1U3.1       | <i>Zingiber zerumbet</i> (Zigiberaceae)                                    |
| Pg alpha-humulene synthase               | ADZ45513.1     | <i>Picea glauca</i> (Pinaceae)                                             |
| Pepg longifolene synthase                | ADZ45515.1     | <i>Picea engelmannii x Picea glauca</i> (Pinaceae)                         |
| Pa longifolene synthase 1                | AAS47695.1     | <i>Picea abies</i> (Pinaceae)                                              |
| Ps longifolene synthase                  | ABV44454.1     | <i>Pinus sylvestris</i> (Pinaceae)                                         |
| Ps alpha-longipinene synthase            | ADZ45516.1     | <i>Picea sitchensis</i> (Pinaceae)                                         |
| Pa longifolene synthase 2                | Q675L0.1       | <i>Picea abies</i> (Pinaceae)                                              |
| Vo valerena-1,10-diene synthase          | AGB05610.1     | <i>Valeriana officinalis</i> (Valerianaceae)                               |
| Zm 7-epi-sesquithujene synthase          | Q6JD73.1       | <i>Zea mays</i> (Poaceae)                                                  |
| Ag alpha-bisabolene synthase             | O81086         | <i>Abies grandis</i> (Pinaceae)                                            |
| Zm tps5-Dell                             | Q6JD70.1       | <i>Zea mays</i> (Poaceae)                                                  |
| Zo(S)-beta-bisabolene synthase           | D2YZP9         | <i>Zingiber officinale</i> (Zigiberaceae)                                  |
| At (Z)-gamma-bisabolene synthase         | Q9T0J9.2       | <i>Arabidopsis thaliana</i> (Brassicaceae)                                 |
| Gb alpha bisabolene synthase             | AIU94290.1     | <i>Ginkgo biloba</i> (Ginkgoaceae)                                         |
| Pm(E)-gamma-bisabolene synthase          | Q4QSN4         | <i>Pseudotsuga menziesii</i> (Pinaceae)                                    |
| Sa beta-bisabolene synthase              | E3W205         | <i>Santalum austrocaledonicum</i> (Santalaceae)                            |
| Ss alpha-bisabolol synthase              | E3W206         | <i>Santalum spicatum</i> (Santalaceae)                                     |
| Pa E-alpha-bisabolene synthase           | AAS47689       | <i>Picea abies</i> (Pinaceae)                                              |
| Zo (S)-beta-bisabolene synthase          | BAI67934.1     | <i>Zingiber officinale</i> (Zigiberaceae)                                  |
| Sb beta-sesquiphellandrene synthase      | C5YHI2         | <i>Sorghum bicolor</i> (Poaceae)                                           |
| Ss a-bisabolol synthase                  | ADO87004.1     | <i>Santalum spicatum</i> (Santalaceae)                                     |
| Zo sesquiterpene synthase                | BAI67935.1     | <i>Zingiber officinale</i> (Zigiberaceae)                                  |
| Ag E-alpha-bisabolene synthase           | AAC24192.1     | <i>Abies grandis</i> (Pinaceae)                                            |
| Sa b-bisabolene synthase                 | ADO87003.1     | <i>Santalum austrocaledonicum</i> (Santalaceae)                            |
| Ha (Z)-gamma-bisabolene synthase K11     | AME16498.1     | <i>Helianthus annuus</i> (Asteraceae)                                      |
| Ha (Z)-gamma-bisabolene synthase K7      | AME16497.1     | <i>Helianthus annuus</i> (Asteraceae)                                      |
| Zm (S)-beta-macrocarpene synthase 1      | AAS88576.1     | <i>Zea mays</i> (Poaceae)                                                  |
| Zm(S)-beta-macrocarpene synthase 2       | Q1EG72.1       | <i>Zea mays</i> (Poaceae)                                                  |
| Ee bisabolol synthase                    | AYJ71561.1     | <i>Eremanthus erythropappus</i>                                            |
| Pd(+)-epi-alpha-bisabolol synthase       | J7LH11         | <i>Phyla dulcis</i> (Verbenaceae)                                          |
| Aa bisabolol synthase                    | AFV40969.1     | <i>Artemisia annua</i> (Asteraceae)                                        |
| Am (+)-alpha-bisabolol synthase          | BAW34954.1     | <i>Artemisia maritima</i> (Asteraceae)                                     |
| Ak (+)-alpha-bisabolol synthase          | BAW34955.1     | <i>Artemisia kurramensis</i> (Asteraceae)                                  |

|                                     |            |                                                                              |
|-------------------------------------|------------|------------------------------------------------------------------------------|
| Mcvr a-bisabolol synthase           | AIW00681.1 | <i>Matricaria chamomilla</i> var. <i>recutita</i>                            |
| Aabs koidzumiol synthase            | BAW34956.1 | <i>Artemisia absinthium</i> (Asteraceae)                                     |
| Aabs koidzumiol synthase            | BAW34957.1 | <i>Artemisia absinthium</i> (Asteraceae)                                     |
| Aa amorpho-4,11-diene synthase      | Q9AR04.2   | <i>Artemisia annua</i> (Asteraceae)                                          |
| Aa epi-cedrol synthase              | CAC08805.1 | <i>Artemisia annua</i> (Asteraceae)                                          |
| Mcvr sesquiterpene synthase 1       | AIG92846.1 | <i>Matricaria chamomilla</i> var. <i>recutita</i><br>(Asteraceae)            |
| Mcvr sesquiterpene synthase 4       | AIG92848.1 | <i>Matricaria chamomilla</i> var. <i>recutita</i><br>(Asteraceae)            |
| Vvcpn beta-curcumene synthase       | HM807381.1 | <i>Vitis vinifera</i> isolate VvPNbCur cultivar<br>Pinot Noir (Vitaceae)     |
| Pc gamma-curcumene synthase         | AY508726.1 | <i>Pogostemon cablin</i> (Lamiaceae)                                         |
| Vvcg (E)-alpha-bergamotene synthase | HM807376.2 | <i>Vitis vinifera</i> isolate VvGwaBer cultivar<br>Gewurztraminer (Vitaceae) |
| Pd trans-alpha-bergamotene synthase | J7LQ09.1   | <i>Phyla dulcis</i> (Verbenaceae)                                            |
| La exo-alpha-bergamotene synthase   | Q2XSC4.1   | <i>Lavandula angustifolia</i> (Lamiaceae)                                    |
| Sa santalene bergamotene synthase 1 | ADP30866.1 | <i>Santalum album</i> (Santalaceae)                                          |
| Sa santalene bergamotene synthase 2 | ADP30867.1 | <i>Santalum album</i> (Santalaceae)                                          |
| Ss santalene synthase               | ADO87002.1 | <i>Santalum spicatum</i> (Santalaceae)                                       |
| Sau santalene synthase              | ADO87001.1 | <i>Santalum austrocaledonicum</i> (Santalaceae)                              |
| Sb zingiberene synthase             | C5YHH7     | <i>Sorghum bicolor</i> (Poaceae)                                             |
| Ob alpha-zingiberene synthase       | Q5SBP4.1   | <i>Ocimum basilicum</i> (Labiatae)                                           |
| At alpha-barbatene synthase         | Q4KSH9.2   | <i>Arabidopsis thaliana</i> (Brassicaceae)                                   |

**Table S2** Oligo-nucleotide primers used in this study.

| Name              | Sequence (5'-3')                        | Purpose            |
|-------------------|-----------------------------------------|--------------------|
| pET SmSTPS3-F:    | TTCCATGGCTATGGCTACAACAAGTAGAAAT         | Protein expression |
| pET SmSTPS3-R:    | ACGCGTCGACCTACATCTTGATAGGATCCACGAA<br>C | Protein expression |
| pET AaGAS-F:      | CGGGAGCTCATGGCAGCGGTTCAAGCTAATG         | Protein expression |
| pET AaGAS-R:      | CGGCTCGAGTTACACGGGGTAGAGAACCCAC         | Protein expression |
| pET AtTPS21-F:    | CGGGATCCATGGGGAGTGAAGTCAACCG            | Protein expression |
| pET AtTPS21-R:    | CGGAGCTCTCAAATGGGTATAGTTTCAATGAGCA      | Protein expression |
| pET PTSiso-F:     | TTTGGATCCATGGAGTTGTATGCCCAAAGTGTTG      | Protein expression |
| pET PTSiso-R:     | TTTGAGCTCATATGGAACAGGGTGAAGGTACAAC<br>T | Protein expression |
| pET AaCES-F:      | CGCGGATCCATGTCTCTTATAGTAGAGGATGTC       | Protein expression |
| pET AaCES-R:      | AAAGAGCTCTCATGTAATGATGGCATCAAC          | Protein expression |
| SmSTPS3-C438G-F:  | GGTCTCCTCATTGGCCGAGTCAT                 | mutagenesis        |
| SmSTPS3-C438G-R:  | ATGACTCGGCAATGAGGAGACC                  | mutagenesis        |
| SmSTPS3-C438S-F:  | GGTCTCCTCATTAGCCGAGTCAT                 | mutagenesis        |
| SmSTPS3-C438S-R:  | ATGACTCGGCTAATGAGGAGACC                 | mutagenesis        |
| AaGAS-S454G-F:    | CTGAGTTGATTGGAAGACTTCAAG                | mutagenesis        |
| AaGAS-S454G-R:    | CTTGAAGTCTTCCAATCAACTCAG                | mutagenesis        |
| AaGAS-S454C-F:    | CTGAGTTGATTGTAGACTTCAAG                 | mutagenesis        |
| AaGAS-S454C-R:    | CTTGAAGTCTACAAATCAACTCAG                | mutagenesis        |
| AtTPS21-S441G-F:  | CTGAGATAATAGGTCGATTCACA                 | mutagenesis        |
| AtTPS21- S441G-R: | TGTGAATCGACCTATTATCTCAG                 | mutagenesis        |
| AtTPS21- S441C-F: | CTGAGATAATATGTCGATTCACA                 | mutagenesis        |
| AtTPS21- S441C-R: | TGTGAATCGACATATTATCTCAG                 | mutagenesis        |
| PTSiso-A445G-F:   | CGTTAATCATTGGTAGGCTCATC                 | mutagenesis        |
| PTSiso-A445G-R:   | GATGAGCTACCAATGATTAACG                  | mutagenesis        |
| PTSiso-A445C-F:   | CGTTAATCATTGTAGGCTCATC                  | mutagenesis        |
| PTSiso-A445C-R:   | GATGAGCTACAAATGATTAACG                  | mutagenesis        |
| PTSiso-A445S-F:   | CGTTAATCATTAGTAGGCTCATC                 | mutagenesis        |
| PTSiso-A445S-R:   | GATGAGCTACTAATGATTAACG                  | mutagenesis        |

AaCES-C439G-F:  
AaCES-C439G-R:

GTTGTCTACTTGGTAGAACCAT  
ATGTTCTACCAAGTAGACAAC

mutagenesis  
mutagenesis

**Table S3** Product profiles of SmSTPS3, AaGAS and their mutants (%).

| Compounds              | SmSTPS3 Wt     | SmSTPS:3C438G | SmSTPS:3C438S | AaGAS Wt | AaGAS:S454G | AaGAS:S454C |
|------------------------|----------------|---------------|---------------|----------|-------------|-------------|
| (-)-5-epieremophilene  | 100.0          | 39.4          | 92.2          | —        | —           | —           |
| $\beta$ -elemene       | — <sup>a</sup> | 5.9           | 5.3           | 93.5     | 19.5        | 93.8        |
| elemol                 | —              | 54.7          | 2.5           | —        | 74.4        | —           |
| unknown sesquiterpene  | —              | —             | —             | 6.5      | 0.8         | 6.2         |
| $\beta$ -caryophyllene | —              | —             | —             | —        | 4.3         | —           |
| $\alpha$ -humulene     | —              | —             | —             | —        | 1.0         | —           |

**Table S4** Product profiles of AtTPS21 and its mutants (%).

| Compounds              | AtTPS21 Wt     | AtTPS21:S441G | AtTPS21:S441C |
|------------------------|----------------|---------------|---------------|
| $\beta$ -caryophyllene | 92.9           | 24.5          | 52.9          |
| $\alpha$ -humulene     | 7.1            | 3.4           | 10.0          |
| elemol                 | — <sup>a</sup> | 69.2          | —             |
| guaiol                 | —              | 2.9           | —             |
| $\alpha$ -copaene      | —              | —             | 6.2           |
| $\beta$ -copaene       | —              | —             | 3.3           |
| $\gamma$ -muurolene    | —              | —             | 1.9           |
| germacrene D           | —              | —             | 1.3           |
| cubebol                | —              | —             | 2.4           |
| $\delta$ -cadinene     | —              | —             | 1.6           |
| germacrene D-4-ol      | —              | —             | 6.7           |
| copaborneol            | —              | —             | 5.1           |
| torreyol               | —              | —             | 8.6           |

**Table S5** Product profiles of PTSiso and its mutants (%).

| Compounds              | PTSiso Wt      | PTSiso:A445S | PTSiso:A445G | PTSiso:A445C |
|------------------------|----------------|--------------|--------------|--------------|
| $\beta$ -patchoulene   | 1.8            | 1.9          | 1.2          | 3.2          |
| $\beta$ -elemene       | 6.4            | 11.3         | 6.4          | 37.5         |
| $\beta$ -caryophellene | 3.2            | 2.0          | 1.8          | 4.6          |
| $\alpha$ -guaiene      | 14.6           | 7.0          | 9.6          | 7.2          |
| seychellene            | 6.4            | 3.4          | 2.7          | 1.2          |
| $\alpha$ -patchoulene  | 3.4            | 3.0          | 1.8          | 1.8          |
| $\gamma$ -patchoulene  | 1.4            | 2.4          | 0.8          | 1.6          |
| guai-4,11-diene        | 4.9            | 6.0          | 3.6          | 4.2          |
| $\alpha$ -bulnesene    | 26.4           | 15.4         | 30.3         | 11.4         |
| unknown sesquiterpene  | 1.6            | 1.7          | 1.0          | 5.6          |
| elemol                 | — <sup>a</sup> | —            | 4.8          | 1.4          |
| unknown sesquiterpene  | —              | —            | —            | 5.3          |
| alcohol                |                |              |              |              |
| pogostol               | 2.6            | 2.6          | 3.4          | 2.6          |
| patchoulol             | 27.2           | 43.3         | 12.4         | 11.1         |

**Table S6** Retention indices of new products generated by mutant enzymes.

| Compounds           | RI recorded | RI of reference      |
|---------------------|-------------|----------------------|
| elemol              | 1550        | 1550 <sup>[11]</sup> |
| guaiol              | 1597        | 1597 <sup>[12]</sup> |
| $\alpha$ -copaene   | 1377        | 1377 <sup>[9]</sup>  |
| $\beta$ -copaene    | 1430        | 1430 <sup>[9]</sup>  |
| $\gamma$ -muurolene | 1478        | 1478 <sup>[9]</sup>  |
| germacrene D        | 1481        | 1481 <sup>[9]</sup>  |
| cubebol             | 1517        | 1517 <sup>[9]</sup>  |
| $\delta$ -cadinene  | 1525        | 1525 <sup>[9]</sup>  |
| germacrene D-4-ol   | 1577        | 1577 <sup>[9]</sup>  |
| copaborneol         | 1608        | 1608 <sup>[9]</sup>  |
| torreyol            | 1647        | 1647 <sup>[9]</sup>  |
| farnesol            | 1700        | 1700 <sup>[11]</sup> |

**Table S7** Kinetic parameters of SmSTPS3, AaGAS, AtTPS21, PTSiso and their mutants with FDP.

|            | <i>K<sub>m</sub></i> ( $\mu$ M) | <i>k<sub>cat</sub></i> ( $s^{-1}$ ) | <i>k<sub>cat</sub>/K<sub>m</sub></i> ( $s^{-1} \text{ mM}^{-1}$ ) |
|------------|---------------------------------|-------------------------------------|-------------------------------------------------------------------|
| SmSTPS3 WT | 6.56 $\pm$ 0.43                 | (0.44 $\pm$ 0.02) $\times 10^{-1}$  | 6.71 $\pm$ 0.45                                                   |
| C486G      | 5.87 $\pm$ 0.61                 | (0.34 $\pm$ 0.03) $\times 10^{-1}$  | 5.79 $\pm$ 0.56                                                   |
| AaGAS WT   | 5.39 $\pm$ 0.37                 | (0.56 $\pm$ 0.04) $\times 10^{-1}$  | 10.39 $\pm$ 0.72                                                  |
| S454G      | 5.57 $\pm$ 0.51                 | (0.48 $\pm$ 0.03) $\times 10^{-1}$  | 8.62 $\pm$ 0.49                                                   |
| AtTPS21 WT | 3.43 $\pm$ 0.32                 | (0.17 $\pm$ 0.02) $\times 10^{-1}$  | 4.91 $\pm$ 0.41                                                   |
| S439G      | 3.26 $\pm$ 0.30                 | (0.12 $\pm$ 0.02) $\times 10^{-1}$  | 3.68 $\pm$ 0.37                                                   |
| S439C      | 5.13 $\pm$ 0.45                 | (0.06 $\pm$ 0.01) $\times 10^{-1}$  | 1.17 $\pm$ 0.09                                                   |
| PTSiso WT  | 6.83 $\pm$ 0.52                 | (0.32 $\pm$ 0.02) $\times 10^{-2}$  | 0.46 $\pm$ 0.03                                                   |
| A455G      | 6.46 $\pm$ 0.48                 | (0.43 $\pm$ 0.04) $\times 10^{-2}$  | 0.66 $\pm$ 0.05                                                   |
| A455S      | 4.14 $\pm$ 0.58                 | (0.22 $\pm$ 0.01) $\times 10^{-2}$  | 0.53 $\pm$ 0.04                                                   |
| A455C      | 9.85 $\pm$ 0.49                 | (0.34 $\pm$ 0.03) $\times 10^{-2}$  | 0.34 $\pm$ 0.03                                                   |

## References

- [1] Fang X, Li JX, Huang JQ, et al., Systematic identification of functional residues of *Artemisia annua* amorpho-4,11-diene synthase, *Biochem J* 2017; 474: 2191–2202.
- [2] Fang X, Li CY, Yang Y, et al., Identification of a novel (-)-5-epieremophilene synthase from *Salvia miltiorrhiza* via transcriptome mining. *Front Plant Sci* 2017; 8: 627.

- [3] Berteau CM, Voster A, Verstappen FW, et al., Isoprenoid biosynthesis in *Artemisia annua*: cloning and heterologous expression of a germacrene A synthase from a glandular trichome cDNA library. Arch Biochem Biophys 2006; 448: 3–12.
- [4] Tholl D, Chen F, Petri J, et al., Two sesquiterpene synthases are responsible for the complex mixture of sesquiterpenes emitted from *Arabidopsis* flowers. Plant J 2005; 42: 757–771.
- [5] Hartwig S, Frister T, Alemdar S, et al., Expression, purification and activity assay of a patchoulol synthase cDNA variant fused to thioredoxin in *Escherichia coli*. Protein Express Purif 2014; 97: 61–71.
- [6] Deguerry F, Pastore L, Wu S, et al., The diverse sesquiterpene profile of patchouli, *Pogostemon cablin*, is correlated with a limited number of sesquiterpene synthases. Arch Biochem Biophys 2006; 448: 123–136.
- [7] Hua L, Matsuda SPT, The molecular cloning of 8-epicedrol synthases from *Artemisia annua*. Arch Biochem Biophys 1999; 369: 208–212.
- [8] Liang J, Liu J, Brown R, et al., Direct production of dihydroxylated sesquiterpenoids by a maize terpene synthase. Plant J 2018; 94: 847–856.
- [9] Garms S, Köllner TG, Boland W, A multiproduct terpene synthase from *Medicago truncatula* generates cadalane sesquiterpenes via two different mechanisms. J Org Chem 2010; 75: 5590–5600.
- [10] Vardakou M, Salmon M, Faraldos JA, et al., Comparative analysis and validation of the malachite green assay for the high throughput biochemical characterization of terpene synthases, MethodsX 2014; 1: 187–196.
- [11] Xie Y, Wang J, Yang F, et al., Comparative analysis of essential oil components of two *Cryptomeria* species from China. Ind Crop Prod 2011; 34: 1226–1230.
- [12] Dural H, Bagci Y, Ertugrul K, et al., Essential oil composition of two endemic *Centaurea* species from Turkey, *Centaurea mucronifera* and *Centaurea chrysantha*, collected in the same habitat. Biochem Syst Ecol 2003; 31: 1417–1425.
